# Supplementary material for: Reconstruction of insect hormone pathways in an aquatic firefly, Sclerotia aquatilis (Coleoptera: Lampyridae), using RNA-seq
Source: PeerJ. 2019 Aug 2;7:e7428. doi: 10.7717/peerj.7428 (PMC6681800; doi:10.7717/peerj.7428)
Supplement: Supplemental Information 4 [file peerj-07-7428-s004.xlsx]

## Sheet: Raw data Real-time
Real-time PCR
actin						gene_Unigene19505_FPPP					ave dCT	-4.35
	ct1	ct2	ct3	avr CT			ct1	ct2	ct3	AVR CT		d-CT	ddCT	2^-ddCT	av	SD
control (larva1)	30.67	30.81	30.63	30.7033		control (larva1)	27.11	27.17	27.21	27.1633		-3.54	0.81	0.570382	1.1579	0.782949
control (larva2)	30.67	30.84	30.66	30.7233		control (larva2)	26.62	26.54	26.63	26.5967		-4.12667	0.223333	0.856584
control (larva3)	30.98	30.91	30.83	30.9067		control (larva3)	25.61	25.46	25.5	25.5233		-5.38333	-1.03333	2.04675
exp (Pupa1)	29.75	29.22	29.31	29.4267		exp (Pupa1)	26.93	26.83	27.11	26.9567		-2.47	1.88	0.271684	0.25808	0.0809889
exp (Pupa2)	29.8	29.19	29.2	29.3967		exp (Pupa2)	27.78	27.4	27.6	27.5933		-1.80333	2.54667	0.17115
exp (Pupa3)	29.01	28.85	29.05	28.97		exp (Pupa3)	26.07	26.27	26.3	26.2133		-2.75667	1.59333	0.331405
exp (adult1)	29.77	30.24	29.75	29.92		exp (adult1)	23.69	23.63	23.7	23.6733		-6.24667	-1.89667	3.72352	3.50667	0.543843
exp (adult2)	29.75	29.78	29.94	29.8233		exp (adult2)	23.48	23.48	23.56	23.5067		-6.31667	-1.96667	3.90864
exp (adult3)	29.48	29.77	29.84	29.6967		exp (adult3)	23.87	23.81	23.77	23.8167		-5.88	-1.53	2.88786
actin						gene_CL2037_FPPP					ave dCT	-2.63111
	ct1	ct2	ct3	avr CT			ct1	ct2	ct3	AVR CT		d-CT	ddCT	2^-ddCT	av	SD
control (larva1)	30.67	30.81	30.63	30.7033		control (larva1)	27.64	27.05	27.15	27.28		-3.42333	-0.792222	1.73174	1.16826	0.668276
control (larva2)	30.67	30.84	30.66	30.7233		control (larva2)	29.45	29.23	29.25	29.31		-1.41333	1.21778	0.429944
control (larva3)	30.98	30.91	30.83	30.9067		control (larva3)	27.53	28.05	27.97	27.85		-3.05667	-0.425556	1.34309
exp (Pupa1)	29.75	29.22	29.31	29.4267		exp (Pupa1)	28.38	28.48	28.26	28.3733		-1.05333	1.57778	0.334997	0.238089	0.0911263
exp (Pupa2)	29.8	29.19	29.2	29.3967		exp (Pupa2)	28.86	29.18	28.71	28.9167		-0.48	2.15111	0.225139
exp (Pupa3)	29.01	28.85	29.05	28.97		exp (Pupa3)	29	29.3	28.81	29.0367		0.0666667	2.69778	0.15413
exp (adult1)	29.77	30.24	29.75	29.92		exp (adult1)	25.95	25.85	26.08	25.96		-3.96	-1.32889	2.51209	2.13411	0.515898
exp (adult2)	29.75	29.78	29.94	29.8233		exp (adult2)	26.63	26.74	26.32	26.5633		-3.26	-0.628889	1.54637
exp (adult3)	29.48	29.77	29.84	29.6967		exp (adult3)	25.78	26.05	25.68	25.8367		-3.86	-1.22889	2.34386
actin						gene_CL8545_FOHSDR					ave dCT	-8.22
	ct1	ct2	ct3	avr CT			ct1	ct2	ct3	AVR CT		d-CT	ddCT	2^-ddCT	av	SD
control (larva1)	30.67	30.81	30.63	30.7033		control (larva1)	23.04	23.19	23.03	23.0867		-7.61667	0.603333	0.658231	1.099	0.606001
control (larva2)	30.67	30.84	30.66	30.7233		control (larva2)	22.79	22.58	22.85	22.74		-7.98333	0.236667	0.848704
control (larva3)	30.98	30.91	30.83	30.9067		control (larva3)	21.87	21.81	21.86	21.8467		-9.06	-0.84	1.79005
exp (Pupa1)	29.75	29.22	29.31	29.4267		exp (Pupa1)	28.83	28.37	28.7	28.6333		-0.793333	7.42667	0.00581233	0.0140647	0.0126456
exp (Pupa2)	29.8	29.19	29.2	29.3967		exp (Pupa2)	28.05	28.3	28.21	28.1867		-1.21	7.01	0.00775854
exp (Pupa3)	29.01	28.85	29.05	28.97		exp (Pupa3)	25.89	25.87	25.87	25.8767		-3.09333	5.12667	0.0286233
exp (adult1)	29.77	30.24	29.75	29.92		exp (adult1)	26.61	26.63	26.68	26.64		-3.28	4.94	0.0325771	0.0406347	0.0171878
exp (adult2)	29.75	29.78	29.94	29.8233		exp (adult2)	26.63	26.65	26.86	26.7133		-3.11	5.11	0.0289559
exp (adult3)	29.48	29.77	29.84	29.6967		exp (adult3)	25.38	25.56	25.64	25.5267		-4.17	4.05	0.060371
actin						gene_Unigene12692_FOHSDR					ave dCT	-9.30556
	ct1	ct2	ct3	avr CT			ct1	ct2	ct3	AVR CT		d-CT	ddCT	2^-ddCT	av	SD
control (larva1)	30.67	30.81	30.63	30.7033		control (larva1)	21.98	21.18	22.03	21.73		-8.97333	0.332222	0.794312	1.01623	0.220333
control (larva2)	30.67	30.84	30.66	30.7233		control (larva2)	21.42	21.28	21.47	21.39		-9.33333	-0.0277778	1.01944
control (larva3)	30.98	30.91	30.83	30.9067		control (larva3)	21.71	21	21.18	21.2967		-9.61	-0.304444	1.23494
exp (Pupa1)	29.75	29.22	29.31	29.4267		exp (Pupa1)	23.2	23.15	23.42	23.2567		-6.17	3.13556	0.11379	0.149627	0.0521186
exp (Pupa2)	29.8	29.19	29.2	29.3967		exp (Pupa2)	22.15	22.37	22.52	22.3467		-7.05	2.25556	0.209416
exp (Pupa3)	29.01	28.85	29.05	28.97		exp (Pupa3)	22.89	22.51	22.57	22.6567		-6.31333	2.99222	0.125676
exp (adult1)	29.77	30.24	29.75	29.92		exp (adult1)	21.16	21.14	21.47	21.2567		-8.66333	0.642222	0.640725	0.716754	0.135536
exp (adult2)	29.75	29.78	29.94	29.8233		exp (adult2)	21.27	21.15	21.09	21.17		-8.65333	0.652222	0.636299
exp (adult3)	29.48	29.77	29.84	29.6967		exp (adult3)	20.83	20.45	20.48	20.5867		-9.11	0.195556	0.873237
actin						gene_Unigene21984_ALDH					ave dCT	-3.34
	ct1	ct2	ct3	avr CT			ct1	ct2	ct3	AVR CT		d-CT	ddCT	2^-ddCT	av	SD
control (larva1)	30.67	30.81	30.63	30.7033		control (larva1)	26.65	26.82	26.98	26.8167		-3.88667	-0.546667	1.46071	1.19627	0.707137
control (larva2)	30.67	30.84	30.66	30.7233		control (larva2)	28.69	28.56	28.92	28.7233		-2	1.34	0.395021
control (larva3)	30.98	30.91	30.83	30.9067		control (larva3)	26.62	26.87	26.83	26.7733		-4.13333	-0.793333	1.73307
exp (Pupa1)	29.75	29.22	29.31	29.4267		exp (Pupa1)	30.86	30.31	31.06	30.7433		1.31667	4.65667	0.0396464	0.0412648	0.0127909
exp (Pupa2)	29.8	29.19	29.2	29.3967		exp (Pupa2)	30.44	30.1	30.2	30.2467		0.85	4.19	0.0547879
exp (Pupa3)	29.01	28.85	29.05	28.97		exp (Pupa3)	30.77	30.83	30.56	30.72		1.75	5.09	0.0293601
exp (adult1)	29.77	30.24	29.75	29.92		exp (adult1)	31.62	32.21	32.16	31.9967		2.07667	5.41667	0.023411	0.0256687	0.00819345
exp (adult2)	29.75	29.78	29.94	29.8233		exp (adult2)	32.91	31.86	31.87	32.2133		2.39	5.73	0.0188407
exp (adult3)	29.48	29.77	29.84	29.6967		exp (adult3)	31.17	31.58	30.86	31.2033		1.50667	4.84667	0.0347543
actin						gene_Unigene9200_JHAMT					ave dCT	3.14556
	ct1	ct2	ct3	avr CT			ct1	ct2	ct3	AVR CT		d-CT	ddCT	2^-ddCT	av	SD
control (larva1)	30.67	30.81	30.63	30.7033		control (larva1)	34.9	34.71	34.77	34.7933		4.09	0.944444	0.51963	1.36428	1.34259
control (larva2)	30.67	30.84	30.66	30.7233		control (larva2)	32.15	32.54	32.29	32.3267		1.60333	-1.54222	2.91243
control (larva3)	30.98	30.91	30.83	30.9067		control (larva3)	34.58	34.68	34.69	34.65		3.74333	0.597778	0.660771
exp (Pupa1)	29.75	29.22	29.31	29.4267		exp (Pupa1)	20.56	20.47	20.68	20.57		-8.85667	-12.0022	4102.31	3680.5	1233.2
exp (Pupa2)	29.8	29.19	29.2	29.3967		exp (Pupa2)	20.29	20.42	20.37	20.36		-9.03667	-12.1822	4647.45
exp (Pupa3)	29.01	28.85	29.05	28.97		exp (Pupa3)	20.93	20.95	20.98	20.9533		-8.01667	-11.1622	2291.73
exp (adult1)	29.77	30.24	29.75	29.92		exp (adult1)	23.46	23.77	23.69	23.64		-6.28	-9.42556	687.662	601.838	235.747
exp (adult2)	29.75	29.78	29.94	29.8233		exp (adult2)	24.55	24.72	24.47	24.58		-5.24333	-8.38889	335.202
exp (adult3)	29.48	29.77	29.84	29.6967		exp (adult3)	23.07	23.38	23.24	23.23		-6.46667	-9.61222	782.649
actin						gene_CL9077_CYP15A1/C1					ave dCT	-1.86889
	ct1	ct2	ct3	avr CT			ct1	ct2	ct3	AVR CT		d-CT	ddCT	2^-ddCT	av	SD
control (larva1)	30.67	30.81	30.63	30.7033		control (larva1)	28.69	28.97	28.89	28.85		-1.85333	0.0155556	0.989276	1.3325	1.15752
control (larva2)	30.67	30.84	30.66	30.7233		control (larva2)	30.22	29.95	30.52	30.23		-0.493333	1.37556	0.385404
control (larva3)	30.98	30.91	30.83	30.9067		control (larva3)	27.62	27.74	27.58	27.6467		-3.26	-1.39111	2.62281
exp (Pupa1)	29.75	29.22	29.31	29.4267		exp (Pupa1)	30.88	30.07	30.43	30.46		1.03333	2.90222	0.133765	0.102215	0.0448113
exp (Pupa2)	29.8	29.19	29.2	29.3967		exp (Pupa2)	31.82	31.83	31.82	31.8233		2.42667	4.29556	0.0509224
exp (Pupa3)	29.01	28.85	29.05	28.97		exp (Pupa3)	30.5	29.82	30.09	30.1367		1.16667	3.03556	0.121957
exp (adult1)	29.77	30.24	29.75	29.92		exp (adult1)	31.73	32.45	32.07	32.0833		2.16333	4.03222	0.0611196	0.0351304	0.0227265
exp (adult2)	29.75	29.78	29.94	29.8233		exp (adult2)	33.35	32.87	33.56	33.26		3.43667	5.30556	0.0252853
exp (adult3)	29.48	29.77	29.84	29.6967		exp (adult3)	33.17	33.69	33.78	33.5467		3.85	5.71889	0.0189864
actin						gene_Unigene14277_JHE					ave dCT	-7.32889
	ct1	ct2	ct3	avr CT			ct1	ct2	ct3	AVR CT		d-CT	ddCT	2^-ddCT	av	SD
control (larva1)	30.67	30.81	30.63	30.7033		control (larva1)	23.69	23.66	23.55	23.6333		-7.07	0.258889	0.835731	1.13445	0.720091
control (larva2)	30.67	30.84	30.66	30.7233		control (larva2)	24.26	23.71	24.34	24.1033		-6.62	0.708889	0.611791
control (larva3)	30.98	30.91	30.83	30.9067		control (larva3)	22.66	22.65	22.52	22.61		-8.29667	-0.967778	1.95583
exp (Pupa1)	29.75	29.22	29.31	29.4267		exp (Pupa1)	29.58	28.84	28.89	29.1033		-0.323333	7.00556	0.00778247	0.00951306	0.00181057
exp (Pupa2)	29.8	29.19	29.2	29.3967		exp (Pupa2)	28.78	28.76	28.88	28.8067		-0.59	6.73889	0.00936251
exp (Pupa3)	29.01	28.85	29.05	28.97		exp (Pupa3)	27.97	28.32	28	28.0967		-0.873333	6.45556	0.0113942
exp (adult1)	29.77	30.24	29.75	29.92		exp (adult1)	24.59	24.53	24.26	24.46		-5.46	1.86889	0.273784	0.293561	0.0988881
exp (adult2)	29.75	29.78	29.94	29.8233		exp (adult2)	24.75	24.75	24.82	24.7733		-5.05	2.27889	0.206056
exp (adult3)	29.48	29.77	29.84	29.6967		exp (adult3)	23.63	23.71	23.72	23.6867		-6.01	1.31889	0.400844
actin						gene_Unigene8839_JHEH					ave dCT	-8.77778
	ct1	ct2	ct3	avr CT			ct1	ct2	ct3	AVR CT		d-CT	ddCT	2^-ddCT	av	SD
control (larva1)	30.67	30.81	30.63	30.7033		control (larva1)	21.79	21.74	21.48	21.67		-9.03333	-0.255556	1.1938	1.14925	0.658703
control (larva2)	30.67	30.84	30.66	30.7233		control (larva2)	23.01	23.08	23.02	23.0367		-7.68667	1.09111	0.4694
control (larva3)	30.98	30.91	30.83	30.9067		control (larva3)	21.54	21.25	21.09	21.2933		-9.61333	-0.835556	1.78454
exp (Pupa1)	29.75	29.22	29.31	29.4267		exp (Pupa1)	25.5	25.52	26.13	25.7167		-3.71	5.06778	0.0298158	0.031675	0.00902965
exp (Pupa2)	29.8	29.19	29.2	29.3967		exp (Pupa2)	26.12	26.03	25.9	26.0167		-3.38	5.39778	0.0237196
exp (Pupa3)	29.01	28.85	29.05	28.97		exp (Pupa3)	24.66	24.88	24.81	24.7833		-4.18667	4.59111	0.0414895
exp (adult1)	29.77	30.24	29.75	29.92		exp (adult1)	28.42	28.19	27.83	28.1467		-1.77333	7.00444	0.00778847	0.00666408	0.00100624
exp (adult2)	29.75	29.78	29.94	29.8233		exp (adult2)	28.58	28.48	28.33	28.4633		-1.36	7.41778	0.00584826
exp (adult3)	29.48	29.77	29.84	29.6967		exp (adult3)	28.21	28.31	28.13	28.2167		-1.48	7.29778	0.0063555
actin						gene_Unigene9157_JHEH					ave dCT	-8.43333
	ct1	ct2	ct3	avr CT			ct1	ct2	ct3	AVR CT		d-CT	ddCT	2^-ddCT	av	SD
control (larva1)	30.67	30.81	30.63	30.7033		control (larva1)	21.84	22	21.97	21.9367		-8.76667	-0.333333	1.25992	1.19278	0.743943
control (larva2)	30.67	30.84	30.66	30.7233		control (larva2)	23.49	23.48	23.68	23.55		-7.17333	1.26	0.417544
control (larva3)	30.98	30.91	30.83	30.9067		control (larva3)	21.57	21.36	21.71	21.5467		-9.36	-0.926667	1.90088
exp (Pupa1)	29.75	29.22	29.31	29.4267		exp (Pupa1)	24.81	24.38	24.69	24.6267		-4.8	3.63333	0.0805856	0.0672018	0.0184327
exp (Pupa2)	29.8	29.19	29.2	29.3967		exp (Pupa2)	25.42	25.48	25.3	25.4		-3.99667	4.43667	0.0461775
exp (Pupa3)	29.01	28.85	29.05	28.97		exp (Pupa3)	24.5	24.19	24.14	24.2767		-4.69333	3.74	0.0748424
exp (adult1)	29.77	30.24	29.75	29.92		exp (adult1)	21.49	21.14	21.43	21.3533		-8.56667	-0.133333	1.09682	0.677117	0.428481
exp (adult2)	29.75	29.78	29.94	29.8233		exp (adult2)	22.02	21.96	21.77	21.9167		-7.90667	0.526667	0.694157
exp (adult3)	29.48	29.77	29.84	29.6967		exp (adult3)	23.43	23.22	23.31	23.32		-6.37667	2.05667	0.240371
actin						gene_CL987_JHDK					ave dCT	-11.6667
	ct1	ct2	ct3	avr CT			ct1	ct2	ct3	AVR CT		d-CT	ddCT	2^-ddCT	av	SD
control (larva1)	30.67	30.81	30.63	30.7033		control (larva1)	19.72	19.64	19.56	19.64		-11.0633	0.603333	0.658231	1.08172	0.536975
control (larva2)	30.67	30.84	30.66	30.7233		control (larva2)	19.19	19.3	19.13	19.2067		-11.5167	0.15	0.90125
control (larva3)	30.98	30.91	30.83	30.9067		control (larva3)	18.43	18.56	18.47	18.4867		-12.42	-0.753333	1.68568
exp (Pupa1)	29.75	29.22	29.31	29.4267		exp (Pupa1)	23.56	23.61	23.69	23.62		-5.80667	5.86	0.0172173	0.010539	0.00614259
exp (Pupa2)	29.8	29.19	29.2	29.3967		exp (Pupa2)	24.48	24.61	24.36	24.4833		-4.91333	6.75333	0.00926924
exp (Pupa3)	29.01	28.85	29.05	28.97		exp (Pupa3)	25.05	24.8	24.88	24.91		-4.06	7.60667	0.00513056
exp (adult1)	29.77	30.24	29.75	29.92		exp (adult1)	24.34	24.12	24.13	24.1967		-5.72333	5.94333	0.0162509	0.0163256	0.00109665
exp (adult2)	29.75	29.78	29.94	29.8233		exp (adult2)	24.13	24.17	24.27	24.19		-5.63333	6.03333	0.0152681
exp (adult3)	29.48	29.77	29.84	29.6967		exp (adult3)	23.62	24.03	23.96	23.87		-5.82667	5.84	0.0174576
actin						gene_Unigene19886_Spo					ave dCT	-0.607778
	ct1	ct2	ct3	avr CT			ct1	ct2	ct3	AVR CT		d-CT	ddCT	2^-ddCT	av	SD
control (larva1)	30.67	30.81	30.63	30.7033		control (larva1)	30.59	30.42	30.25	30.42		-0.283333	0.324444	0.798606	1.07914	0.542042
control (larva2)	30.67	30.84	30.66	30.7233		control (larva2)	31.05	30.54	30.09	30.56		-0.163333	0.444444	0.734867
control (larva3)	30.98	30.91	30.83	30.9067		control (larva3)	29.44	29.52	29.63	29.53		-1.37667	-0.768889	1.70396
exp (Pupa1)	29.75	29.22	29.31	29.4267		exp (Pupa1)	22.59	22.02	22.39	22.3333		-7.09333	-6.48556	89.608	49.35	39.8774
exp (Pupa2)	29.8	29.19	29.2	29.3967		exp (Pupa2)	25.4	25.6	25.46	25.4867		-3.91	-3.30222	9.86434
exp (Pupa3)	29.01	28.85	29.05	28.97		exp (Pupa3)	22.78	22.75	22.75	22.76		-6.21	-5.60222	48.5777
exp (adult1)	29.77	30.24	29.75	29.92		exp (adult1)	25.56	25.66	25.66	25.6267		-4.29333	-3.68556	12.8666	15.7483	5.14551
exp (adult2)	29.75	29.78	29.94	29.8233		exp (adult2)	25.51	25.6	25.54	25.55		-4.27333	-3.66556	12.6894
exp (adult3)	29.48	29.77	29.84	29.6967		exp (adult3)	24.62	24.67	24.66	24.65		-5.04667	-4.43889	21.689
actin						gene_Unigene12798_Spot					ave dCT	0.551111
	ct1	ct2	ct3	avr CT			ct1	ct2	ct3	AVR CT		d-CT	ddCT	2^-ddCT	av	SD
control (larva1)	30.67	30.81	30.63	30.7033		control (larva1)	29.7	30.31	30.11	30.04		-0.663333	-1.21444	2.32051	1.22655	0.963556
control (larva2)	30.67	30.84	30.66	30.7233		control (larva2)	32	31.3	31.2	31.5		0.776667	0.225556	0.855266
control (larva3)	30.98	30.91	30.83	30.9067		control (larva3)	32.4	32.51	32.43	32.4467		1.54	0.988889	0.503866
exp (Pupa1)	29.75	29.22	29.31	29.4267		exp (Pupa1)	31.73	31.53	32.68	31.98		2.55333	2.00222	0.249615	0.262448	0.150379
exp (Pupa2)	29.8	29.19	29.2	29.3967		exp (Pupa2)	32.58	32.1	34.38	33.02		3.62333	3.07222	0.118896
exp (Pupa3)	29.01	28.85	29.05	28.97		exp (Pupa3)	30.77	31.31	30.25	30.7767		1.80667	1.25556	0.418832
exp (adult1)	29.77	30.24	29.75	29.92		exp (adult1)	34.48	33.89	33.26	33.8767		3.95667	3.40556	0.0943682	0.0842608	0.028816
exp (adult2)	29.75	29.78	29.94	29.8233		exp (adult2)	34.93	34.56	34.45	34.6467		4.82333	4.27222	0.0517527
exp (adult3)	29.48	29.77	29.84	29.6967		exp (adult3)	32.9	34.28	33.25	33.4767		3.78	3.22889	0.106661
actin						gene_Unigene12481_Phm					ave dCT	-3.44556
	ct1	ct2	ct3	avr CT			ct1	ct2	ct3	AVR CT		d-CT	ddCT	2^-ddCT	av	SD
control (larva1)	30.67	30.81	30.63	30.7033		control (larva1)	28.83	28.65	28.54	28.6733		-2.03	1.41556	0.374865	1.2436	0.844953
control (larva2)	30.67	30.84	30.66	30.7233		control (larva2)	26.09	26.2	26.41	26.2333		-4.49	-1.04444	2.06257
control (larva3)	30.98	30.91	30.83	30.9067		control (larva3)	27.14	27.16	26.97	27.09		-3.81667	-0.371111	1.29335
exp (Pupa1)	29.75	29.22	29.31	29.4267		exp (Pupa1)	27.15	27.31	27.27	27.2433		-2.18333	1.26222	0.416901	0.289849	0.110142
exp (Pupa2)	29.8	29.19	29.2	29.3967		exp (Pupa2)	28.11	28.11	27.97	28.0633		-1.33333	2.11222	0.23129
exp (Pupa3)	29.01	28.85	29.05	28.97		exp (Pupa3)	27.79	27.62	27.69	27.7		-1.27	2.17556	0.221357
exp (adult1)	29.77	30.24	29.75	29.92		exp (adult1)	30.88	30.56	30.81	30.75		0.83	4.27556	0.0516333	0.0622769	0.0382371
exp (adult2)	29.75	29.78	29.94	29.8233		exp (adult2)	31.77	31.19	31.28	31.4133		1.59	5.03556	0.0304892
exp (adult3)	29.48	29.77	29.84	29.6967		exp (adult3)	29.54	29.43	29.55	29.5067		-0.19	3.25556	0.104708
actin						gene_Unigene15996_Sad					ave dCT	-3.74778
	ct1	ct2	ct3	avr CT			ct1	ct2	ct3	AVR CT		d-CT	ddCT	2^-ddCT	av	SD
control (larva1)	30.67	30.81	30.63	30.7033		control (larva1)	26.94	26.98	26.79	26.9033		-3.8	-0.0522222	1.03686	1.21229	0.86525
control (larva2)	30.67	30.84	30.66	30.7233		control (larva2)	28.12	28.19	28.09	28.1333		-2.59	1.15778	0.448202
control (larva3)	30.98	30.91	30.83	30.9067		control (larva3)	26.03	26.09	26.04	26.0533		-4.85333	-1.10556	2.15182
exp (Pupa1)	29.75	29.22	29.31	29.4267		exp (Pupa1)	25.09	24.95	24.97	25.0033		-4.42333	-0.675556	1.59721	1.71955	0.546592
exp (Pupa2)	29.8	29.19	29.2	29.3967		exp (Pupa2)	25.21	25.33	25.46	25.3333		-4.06333	-0.315556	1.24449
exp (Pupa3)	29.01	28.85	29.05	28.97		exp (Pupa3)	23.87	24.09	24.07	24.01		-4.96	-1.21222	2.31694
exp (adult1)	29.77	30.24	29.75	29.92		exp (adult1)	21.79	21.66	21.9	21.7833		-8.13667	-4.38889	20.9502	23.4022	2.12655
exp (adult2)	29.75	29.78	29.94	29.8233		exp (adult2)	21.44	21.48	21.42	21.4467		-8.37667	-4.62889	24.742
exp (adult3)	29.48	29.77	29.84	29.6967		exp (adult3)	21.1	21.52	21.38	21.3333		-8.36333	-4.61556	24.5144
actin						gene_CL7713_Shd					ave dCT	-0.0788889
	ct1	ct2	ct3	avr CT			ct1	ct2	ct3	AVR CT		d-CT	ddCT	2^-ddCT	av	SD
control (larva1)	30.67	30.81	30.63	30.7033		control (larva1)	31.62	29.96	31.03	30.87		0.166667	0.245556	0.843491	1.03828	0.364211
control (larva2)	30.67	30.84	30.66	30.7233		control (larva2)	30.95	31.36	30.52	30.9433		0.22	0.298889	0.812878
control (larva3)	30.98	30.91	30.83	30.9067		control (larva3)	30.26	30.31	30.28	30.2833		-0.623333	-0.544444	1.45846
exp (Pupa1)	29.75	29.22	29.31	29.4267		exp (Pupa1)	29.11	29.37	28.95	29.1433		-0.283333	-0.204444	1.15224	0.890249	0.229586
exp (Pupa2)	29.8	29.19	29.2	29.3967		exp (Pupa2)	29.67	29.74	29.94	29.7833		0.386667	0.465556	0.724192
exp (Pupa3)	29.01	28.85	29.05	28.97		exp (Pupa3)	29.55	29.08	29.04	29.2233		0.253333	0.332222	0.794312
exp (adult1)	29.77	30.24	29.75	29.92		exp (adult1)	30.24	30.26	30.64	30.38		0.46	0.538889	0.688301	0.448876	0.227478
exp (adult2)	29.75	29.78	29.94	29.8233		exp (adult2)	30.74	33.34	31.41	31.83		2.00667	2.08556	0.235605
exp (adult3)	29.48	29.77	29.84	29.6967		exp (adult3)	30.95	30.8	30.83	30.86		1.16333	1.24222	0.422721
actin						geneP22_CL2776_Cyp18a1					ave dCT	-4.24556
	ct1	ct2	ct3	avr CT			ct1	ct2	ct3	AVR CT		d-CT	ddCT	2^-ddCT	av	SD
control (larva1)	30.67	30.81	30.63	30.7033		control (larva1)	26.49	26.48	26.23	26.4		-4.30333	-0.0577778	1.04086	1.00279	0.0901407
control (larva2)	30.67	30.84	30.66	30.7233		control (larva2)	26.57	26.64	26.68	26.63		-4.09333	0.152222	0.899863
control (larva3)	30.98	30.91	30.83	30.9067		control (larva3)	26.65	26.48	26.57	26.5667		-4.34	-0.0944444	1.06765
exp (Pupa1)	29.75	29.22	29.31	29.4267		exp (Pupa1)	29.43	28.57	28.88	28.96		-0.466667	3.77889	0.0728519	0.0522404	0.0200385
exp (Pupa2)	29.8	29.19	29.2	29.3967		exp (Pupa2)	30.29	29.81	30.14	30.08		0.683333	4.92889	0.0328289
exp (Pupa3)	29.01	28.85	29.05	28.97		exp (Pupa3)	29.16	28.96	28.93	29.0167		0.0466667	4.29222	0.0510402
exp (adult1)	29.77	30.24	29.75	29.92		exp (adult1)	25.47	25.68	25.79	25.6467		-4.27333	-0.0277778	1.01944	0.92484	0.167959
exp (adult2)	29.75	29.78	29.94	29.8233		exp (adult2)	25.52	25.78	25.33	25.5433		-4.28	-0.0344444	1.02416
exp (adult3)	29.48	29.77	29.84	29.6967		exp (adult3)	25.94	26.02	25.75	25.9033		-3.79333	0.452222	0.730916
actin						gene_CL5335_Dib					ave dCT	-5.50222
	ct1	ct2	ct3	avr CT			ct1	ct2	ct3	AVR CT		d-CT	ddCT	2^-ddCT	av	SD
control (larva1)	30.67	30.81	30.63	30.7033		control (larva1)	25.43	24.96	24.97	25.12		-5.58333	-0.0811111	1.05783	1.06258	0.434527
control (larva2)	30.67	30.84	30.66	30.7233		control (larva2)	26.22	25.87	25.57	25.8867		-4.83667	0.665556	0.630446
control (larva3)	30.98	30.91	30.83	30.9067		control (larva3)	24.87	24.76	24.83	24.82		-6.08667	-0.584444	1.49946
exp (Pupa1)	29.75	29.22	29.31	29.4267		exp (Pupa1)	25.19	25.06	25.23	25.16		-4.26667	1.23556	0.424679	0.323078	0.0891688
exp (Pupa2)	29.8	29.19	29.2	29.3967		exp (Pupa2)	25.77	25.86	25.92	25.85		-3.54667	1.95556	0.257821
exp (Pupa3)	29.01	28.85	29.05	28.97		exp (Pupa3)	25.41	25.43	24.97	25.27		-3.7	1.80222	0.286733
exp (adult1)	29.77	30.24	29.75	29.92		exp (adult1)	25.66	25.17	25.53	25.4533		-4.46667	1.03556	0.487828	0.268438	0.200049
exp (adult2)	29.75	29.78	29.94	29.8233		exp (adult2)	27.72	27.78	27.6	27.7		-2.12333	3.37889	0.0961287
exp (adult3)	29.48	29.77	29.84	29.6967		exp (adult3)	26.38	26.26	26.47	26.37		-3.32667	2.17556	0.221357
actin						gene_Unigene10748_Sro					ave dCT	-0.524444
	ct1	ct2	ct3	avr CT			ct1	ct2	ct3	AVR CT		d-CT	ddCT	2^-ddCT	av	SD
control (larva1)	30.67	30.81	30.63	30.7033		control (larva1)	30.41	29.76	29.41	29.86		-0.843333	-0.318889	1.24737	1.01894	0.23658
control (larva2)	30.67	30.84	30.66	30.7233		control (larva2)	30.69	30.15	30.86	30.5667		-0.156667	0.367778	0.774975
control (larva3)	30.98	30.91	30.83	30.9067		control (larva3)	30.51	30.49	30	30.3333		-0.573333	-0.0488889	1.03447
exp (Pupa1)	29.75	29.22	29.31	29.4267		exp (Pupa1)	30.16	30.02	30.39	30.19		0.763333	1.28778	0.409581	0.531659	0.151838
exp (Pupa2)	29.8	29.19	29.2	29.3967		exp (Pupa2)	29.38	30.01	30.37	29.92		0.523333	1.04778	0.483713
exp (Pupa3)	29.01	28.85	29.05	28.97		exp (Pupa3)	28.8	28.81	29.26	28.9567		-0.0133333	0.511111	0.701682
exp (adult1)	29.77	30.24	29.75	29.92		exp (adult1)	31.57	31.04	32.02	31.5433		1.62333	2.14778	0.22566	0.4942	0.246932
exp (adult2)	29.75	29.78	29.94	29.8233		exp (adult2)	29.42	29.5	30.45	29.79		-0.0333333	0.491111	0.711477
exp (adult3)	29.48	29.77	29.84	29.6967		exp (adult3)	29.89	30.15	30.1	30.0467		0.35	0.874444	0.545464
actin						gene_Unigene21593_Sro					ave dCT	-8.49889
	ct1	ct2	ct3	avr CT			ct1	ct2	ct3	AVR CT		d-CT	ddCT	2^-ddCT	av	SD
control (larva1)	30.67	30.81	30.63	30.7033		control (larva1)	22.26	22.23	21.74	22.0767		-8.62667	-0.127778	1.09261	1.03737	0.32656
control (larva2)	30.67	30.84	30.66	30.7233		control (larva2)	22.94	22.77	22.59	22.7667		-7.95667	0.542222	0.686712
control (larva3)	30.98	30.91	30.83	30.9067		control (larva3)	22.28	21.79	21.91	21.9933		-8.91333	-0.414444	1.33279
exp (Pupa1)	29.75	29.22	29.31	29.4267		exp (Pupa1)	23.6	23.4	23.61	23.5367		-5.89	2.60889	0.163925	0.144232	0.0344386
exp (Pupa2)	29.8	29.19	29.2	29.3967		exp (Pupa2)	24.14	23.96	24.37	24.1567		-5.24	3.25889	0.104466
exp (Pupa3)	29.01	28.85	29.05	28.97		exp (Pupa3)	23.35	22.86	23.02	23.0767		-5.89333	2.60556	0.164305
exp (adult1)	29.77	30.24	29.75	29.92		exp (adult1)	25.54	25.5	25.54	25.5267		-4.39333	4.10556	0.0580904	0.117654	0.0948686
exp (adult2)	29.75	29.78	29.94	29.8233		exp (adult2)	25.21	25.24	25.17	25.2067		-4.61667	3.88222	0.0678164
exp (adult3)	29.48	29.77	29.84	29.6967		exp (adult3)	23.59	23.29	23.13	23.3367		-6.36	2.13889	0.227055
